# Supplementary material
Source: MDPI journal article supplement (https://www.mdpi.com/2073-4344/12/9/966)
Supplement: s1 [file s1]

# Supporting Information

## **Coupling Interface Construction of Ni(OH)<sub>2</sub>/MoS<sub>2</sub> Composite Electrode for Efficient Alkaline Oxygen Evolution Reaction.**

Ge Liu<sup>1</sup>, Xuezhi Ouyang<sup>1</sup>, Xue-Ling Wei<sup>2\*</sup>, Wei-Wei Bao<sup>2</sup>, Xiao-Hua Feng<sup>1</sup>, Jun-Jun Zhang<sup>1,3\*</sup>

<sup>1</sup>School of Materials Science and Chemical Engineering, Xi'an Technological University, Xi'an, Shaanxi 710021, China.

<sup>2</sup>National & Local Joint Engineering Laboratory for Slag Comprehensive Utilization and Environmental Technology, School of Material Science and Engineering, Shaanxi University of Technology, Hanzhong 723000, Shaanxi, China

<sup>3</sup>State Key Laboratory of High-efficiency Utilization of Coal and Green Chemical Engineering, College of Chemistry & Chemical Engineering, Ningxia University, Yinchuan 750021, Ningxia, China

## **Correspondence to:**

E-mail: weixueling@sntu.edu.cn (X. L. Wei); zhangjunjun@xatu.edu.cn (J. J. Zhang).

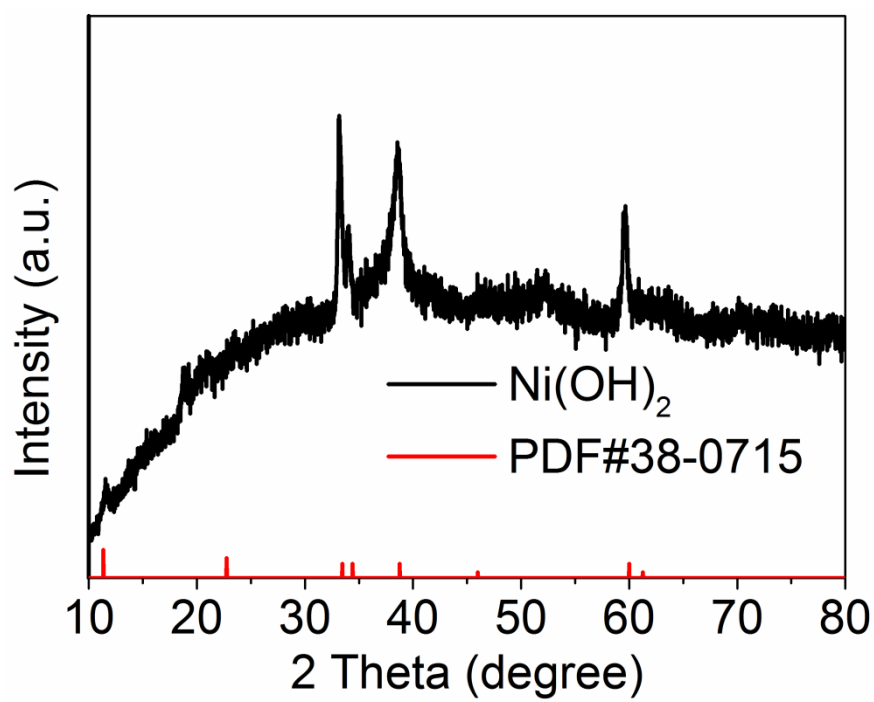

**Figure S1.** The XRD pattern of  $\text{Ni(OH)}_2$  powder.

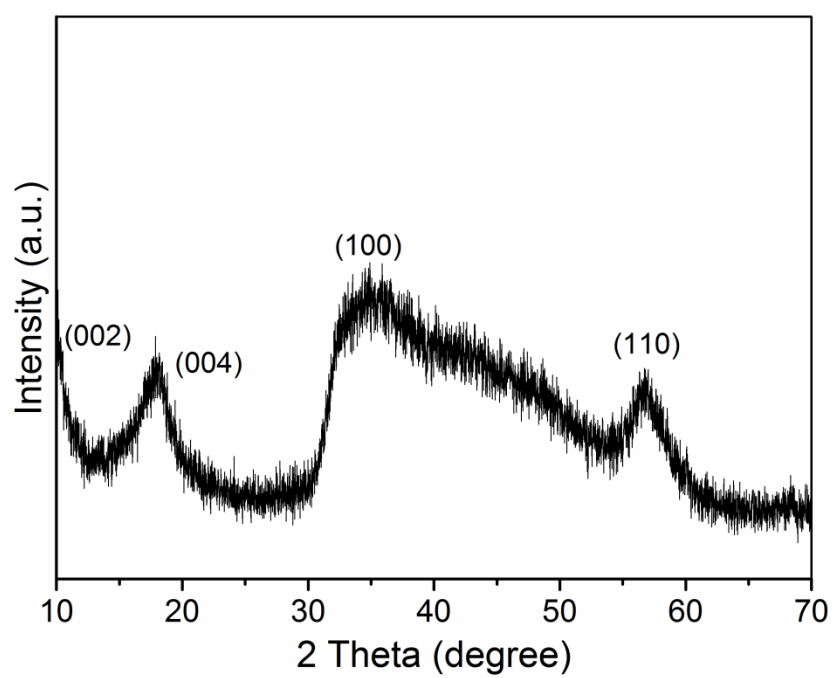

**Figure S2.** The XRD pattern MoS<sub>2</sub> powder. The peak at (002) is significantly shifted compared to the standard card, probably because of a small change in the interlayer spacing.

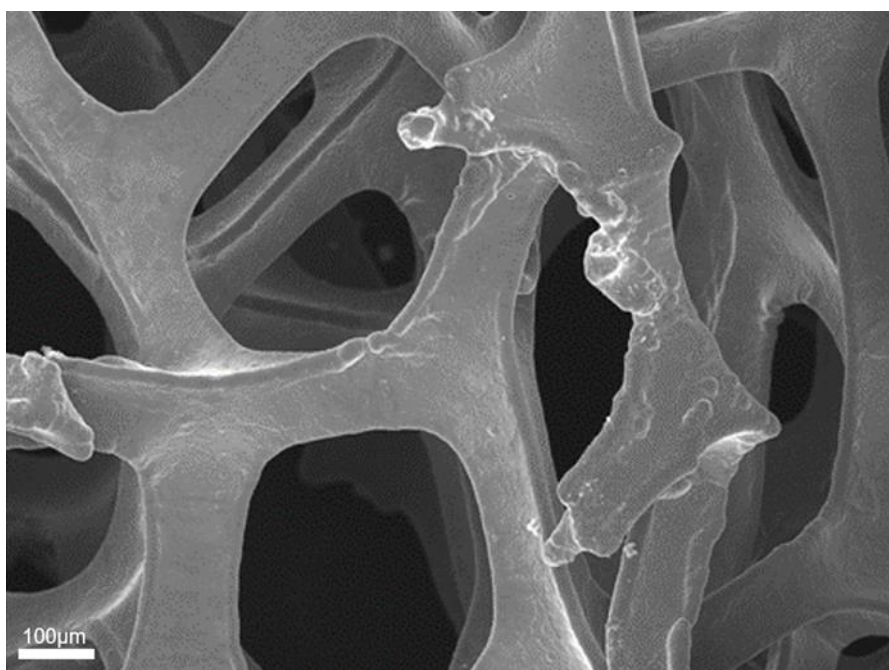

**Figure S3.** High resolution scanning electron microscopy with NF.

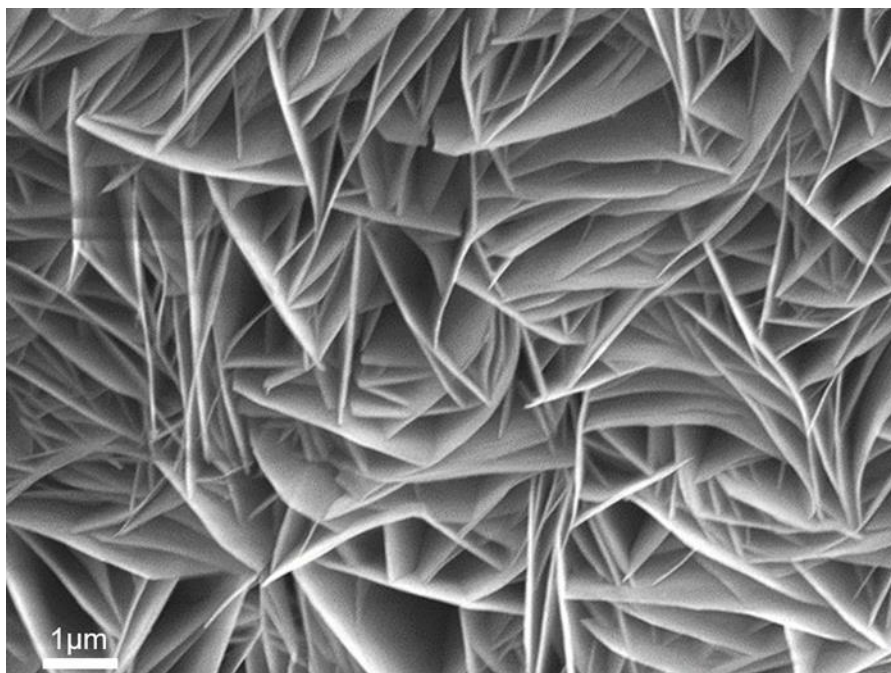

**Figure S4.** High resolution scanning electron microscopy of Ni(OH)<sub>2</sub>/NF.

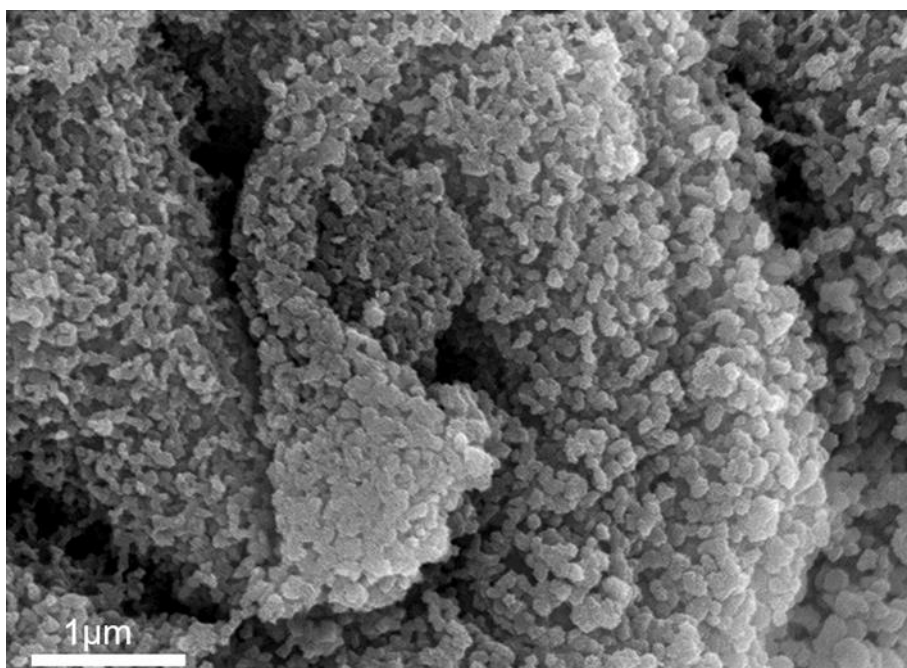

**Figure S5.** High resolution scanning electron microscopy of MoS<sub>2</sub>/NF.

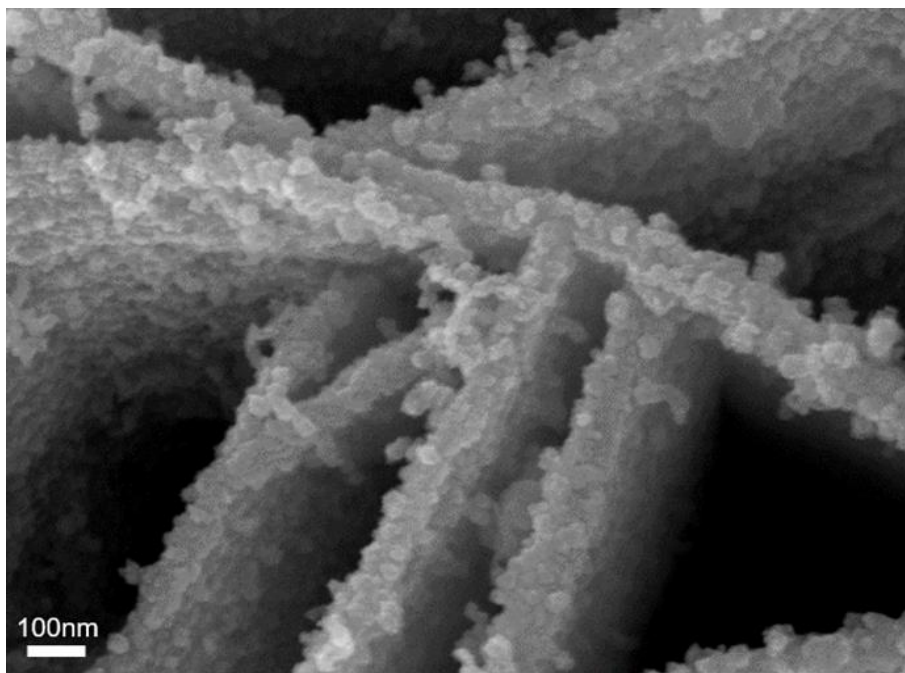

**Figure S6.** High resolution scanning electron microscopy of  $\text{Ni(OH)}_2/\text{MoS}_2/\text{NF}$ .

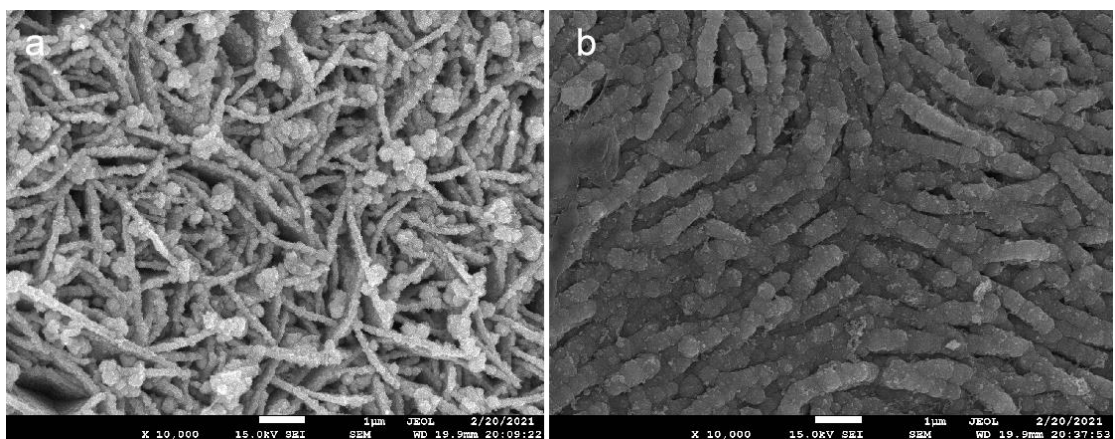

**Figure S7.** Scanning electron microscopy images of (a)  $\text{Ni}(\text{OH})_2/\text{MoS}_2/\text{NF-13}$  and (b)  $\text{Ni}(\text{OH})_2/\text{MoS}_2/\text{NF-30}$  electrodes.



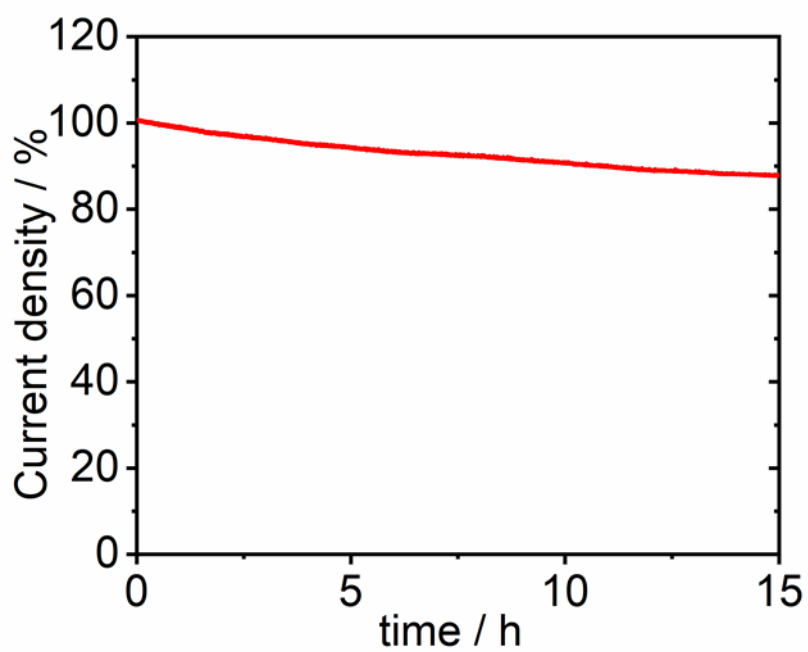

**Figure S8.** The chronoamperometry measurement of  $\text{Ni(OH)}_2/\text{MoS}_2/\text{NF}$  electrode.

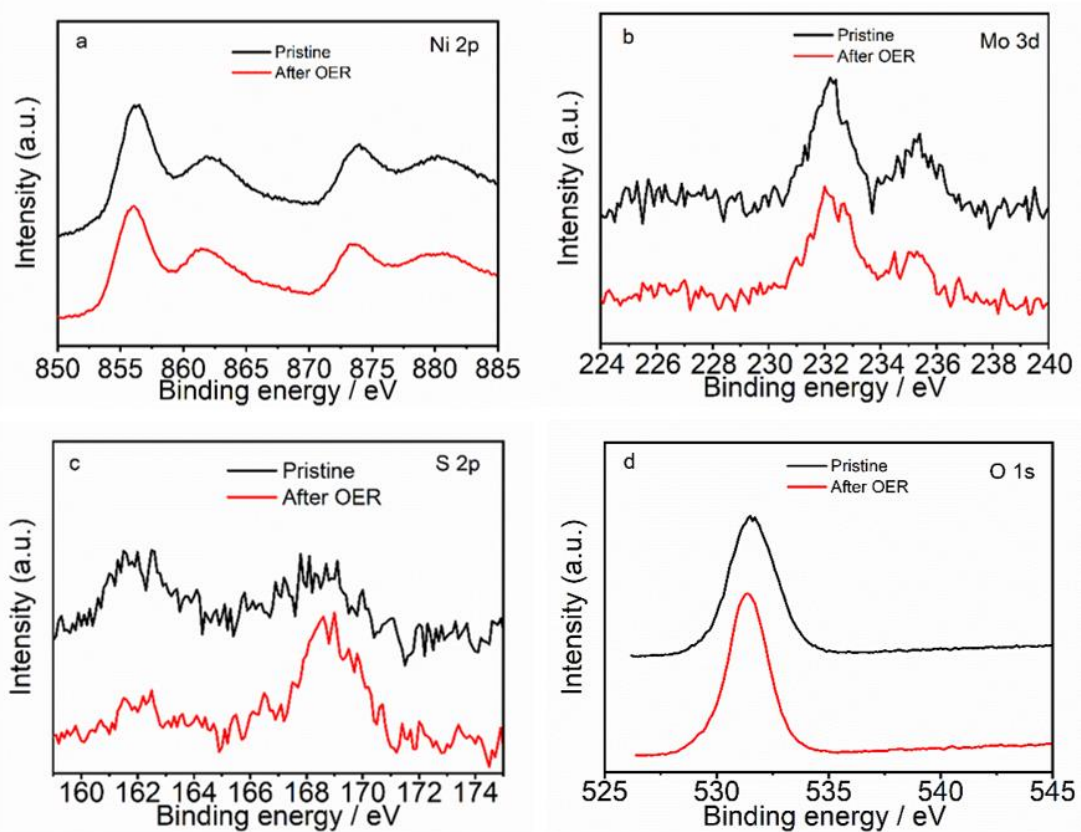

**Figure S9.** High-resolution XPS (a) Ni 2p, (b) Mo 3d, (c) S 2p and (d) O 1s of  $\text{Ni(OH)}_2/\text{MoS}_2/\text{NF}$  electrode before and after long- time stability test.

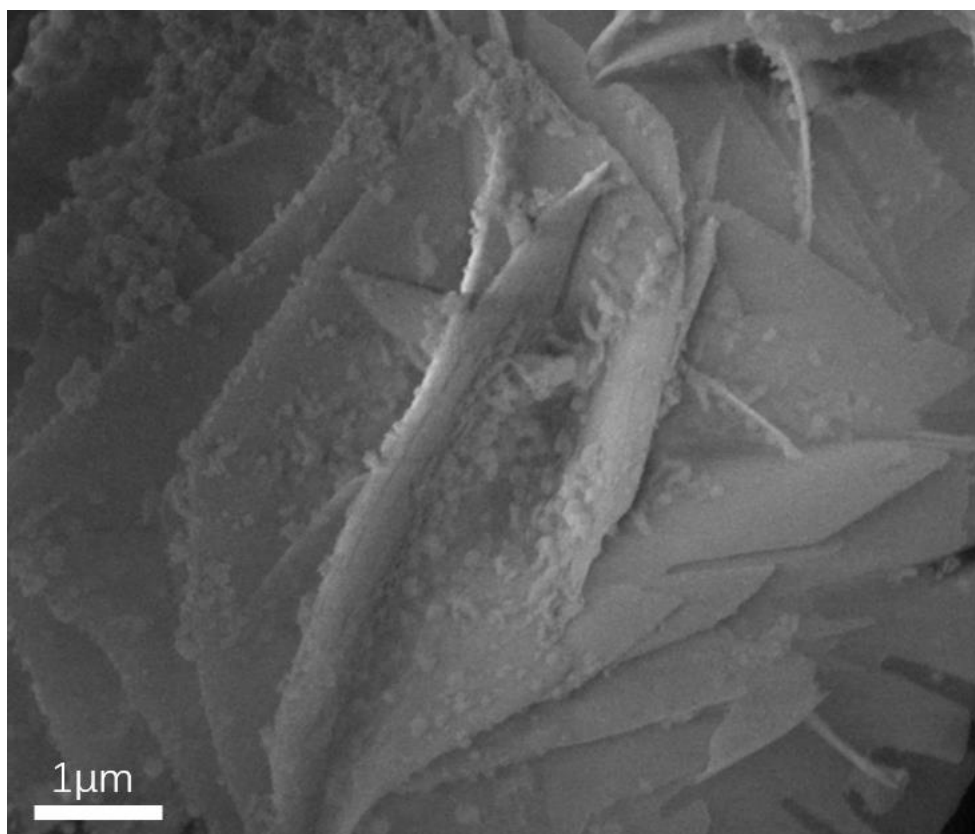

**Figure S10.** The SEM image of Ni(OH)<sub>2</sub>/MoS<sub>2</sub>/NF electrode after long- time stability test.

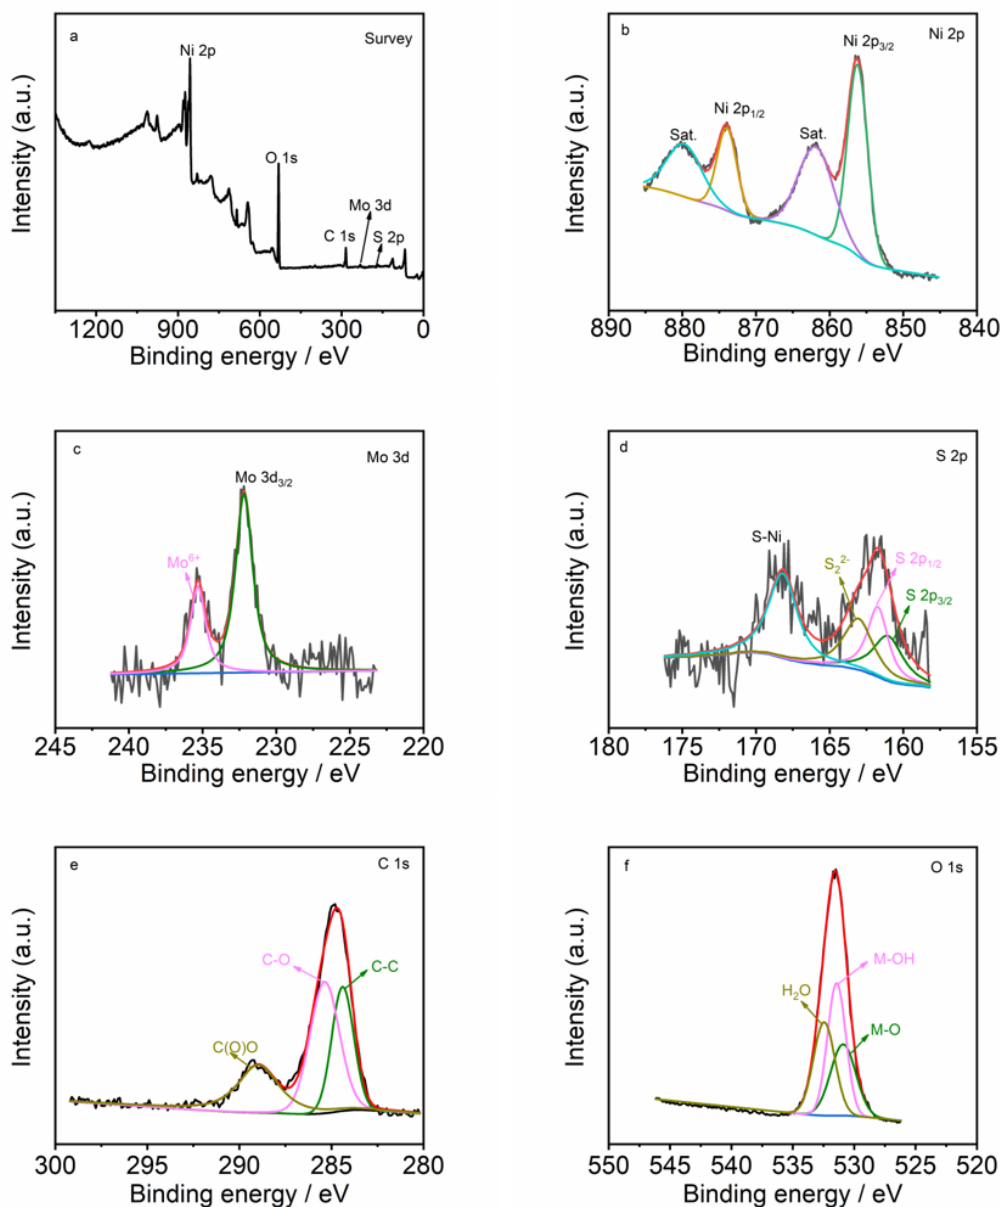

**Figure S11.** (a) XPS survey spectra, (b) Ni 2p, (c) Mo 3d, (d) S 2p, (e) C 1s and (f) O 1s of  $\text{Ni(OH)}_2/\text{MoS}_2/\text{NF}$  electrode.

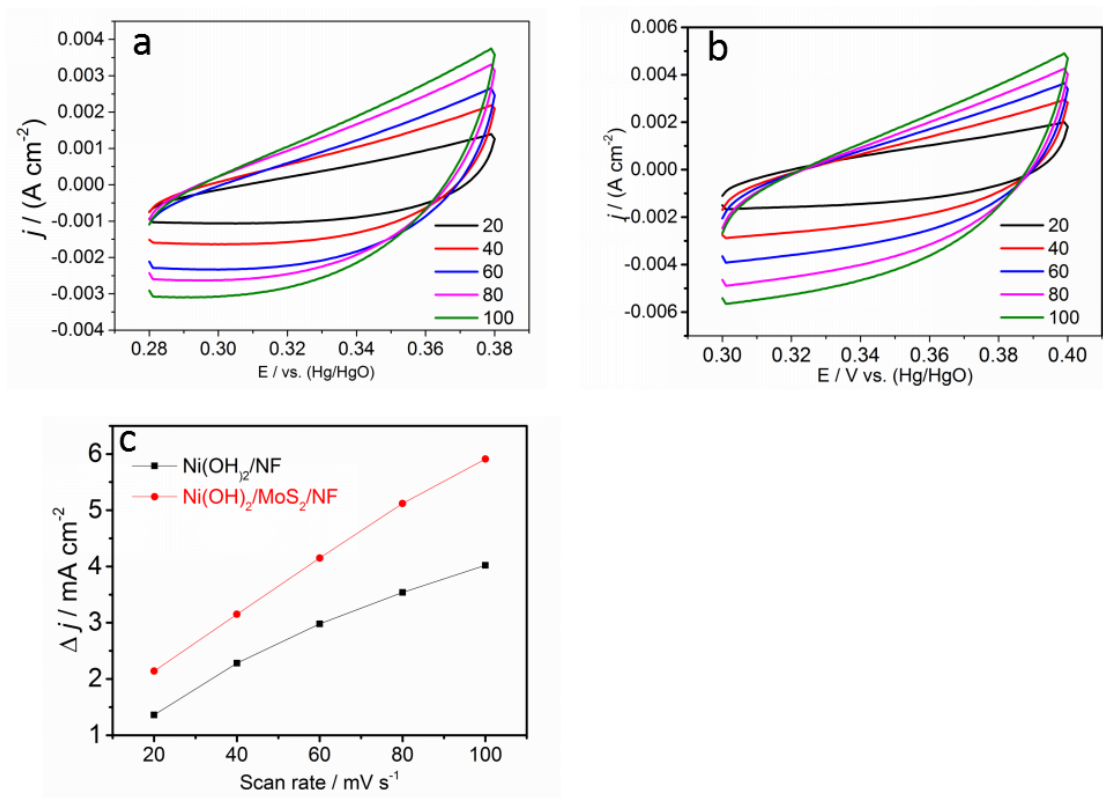

**Figure S12.** CV curves of the (a)  $\text{Ni(OH)}_2/\text{NF}$  and (b)  $\text{Ni(OH)}_2/\text{MoS}_2/\text{NF}$  electrodes measured at different scan rates from 20 to 100  $\text{mV s}^{-1}$  in a potential window without faradaic processes. (c) Plots of the current density vs. the scan rates for  $\text{Ni(OH)}_2/\text{NF}$  and  $\text{Ni(OH)}_2/\text{MoS}_2/\text{NF}$  electrodes.

**Table S1.** Comparison of OER performance of Ni(OH)<sub>2</sub>/MoS<sub>2</sub>/NF catalyst with other reports

| Catalyst                                                                             | Tafel slope<br>(mV dec <sup>-1</sup> ) | j(mA cm <sup>-2</sup> ) | Overpotential<br>(η/mV) | Reference                                                            |
|--------------------------------------------------------------------------------------|----------------------------------------|-------------------------|-------------------------|----------------------------------------------------------------------|
| Ni(OH) <sub>2</sub> /MoS <sub>2</sub> /NF                                            | 62                                     | 50                      | 296                     | This work                                                            |
|                                                                                      |                                        | 100                     | 314                     |                                                                      |
| Ti@NiCo <sub>2</sub> O <sub>4</sub>                                                  | 61                                     | 10                      | 353                     | International Journal of Hydrogen Energy, 2020, 46, 10259-10267 [1]. |
| CoMoO <sub>4</sub>                                                                   | 56                                     | 10                      | 312                     | Chem. Commun., 2015, 51, 14361-14364 [2].                            |
| CoCr LDH                                                                             | 81                                     | 10                      | 340                     | Mater. Chem. A 2016, 4, 11292-11298 [3].                             |
| Co <sub>9</sub> S <sub>8</sub> @Co <sub>9</sub> S <sub>8</sub> @MoS <sub>2-0.5</sub> | 71.5                                   | 10                      | 340                     | Inorg. Chem. Front., 2020, 7, 191-197 [4].                           |
| MoS <sub>2</sub> @CoO                                                                | 129.9                                  | 10                      | 325                     | J. Phys. Chem. C 2019, 123, 10, 5833-5839 [5].                       |
| Pd <sub>2</sub> /MoS <sub>2</sub>                                                    | --                                     | 10                      | 320                     | New J. Chem., 2020, 44, 16135-16143 [6].                             |
| NiCo <sub>2.7</sub> (OH) <sub>x</sub>                                                | 65                                     | 10                      | 350                     | Adv. Energy Mater. 2015, 5, 1401880 [7].                             |
| Co <sub>3</sub> O <sub>4</sub> /NiCo <sub>2</sub> O <sub>4</sub>                     | 88                                     | 10                      | 340                     | J. Am. Chem. Soc. 2015, 137, 5590-5595 [8].                          |
| Ni/NiO                                                                               | 58                                     | 10                      | 470                     | New J. Chem., 2020, 44, 17507-175171 [9].                            |
| β-Co(OH) <sub>2</sub>                                                                | 57                                     | 10                      | 390                     | ACS Appl. Energy Mater. 2020, 3, 2, 1461-1467 [10].                  |
| Fe <sub>0.22</sub> Ni <sub>0.78</sub> (OH) <sub>2</sub>                              | 35                                     | 10                      | 315                     | ACS Appl. Energy Mater. 2019, 2, 3, 1961-1968 [11].                  |
| MoS <sub>2</sub> QDs-AC                                                              | 39                                     | 10                      | 370                     | ACS Catal. 2018, 8, 3, 1683-1689 [12].                               |

## References.

1. Bao, W.W.; Xiao, L.; Zhang, J.J.; Jiang, P.; Zou, X.Y.; Yang, C.M.; Hao, X.L.; Ai, T.T. Electronic and structural engineering of NiCo<sub>2</sub>O<sub>4</sub>/Ti electrocatalysts for efficient oxygen evolution reaction, *Int. J. Hydrog. Energy* **2021**, *46*, 10259-10267.
2. Yu, M.Q.; Li, X.J.; Hua, G.Y. Ultrathin nanosheets constructed CoMoO<sub>4</sub> porous flowers with high activity for electrocatalytic oxygen evolution. *Chem. Commun.* **2015**, *51*, 14361-14364.
3. Dong, C.L.; Yuan, X.T.; Wang, X.; Liu, X.Y.; Dong, W.J.; Wang, R.Q.; Duan, Y.H.; Huang, F.Q.; Rational design of cobalt–chromium layered double hydroxide as a highly efficient electrocatalyst for water oxidation, *J. Mater. Chem. A* **2016**, *4*, 11292-11298.
4. Li, J.; Li, G.S.; Wang, J.H.; Xue, C.L.; Li, X.S.; Wang, S.; Han, B.Q.; Yang, M.; Li, L.P. A novel core–double shell heterostructure derived from a metal–organic framework for efficient HER, OER and ORR electrocatalysis, *Inorg. Chem. Front.* **2020**, *7*, 191-197.
5. Cheng, P.F.; Yuan, C.; Zhou, Q.W.; Hu, X.B.; Li, J.; Lin, X.Z.; Wang, X.; Jin, M.L.; Shui, L.L.; Gao, X.S.; Nötzel, R.; Zhou, G.F.; Zhang, Z.; Liu, J.M. Core–Shell MoS<sub>2</sub>@CoO electrocatalyst for water splitting in neutral and alkaline solutions, *J. Phys. Chem. C* **2019**, *123*, 5833-5839.
6. He, F.; Liu, Y.J.; Ca, Q.H.; Zhao, J.X. Size-dependent electrocatalytic activity of ORR/OER on palladium nanoclusters anchored on defective MoS<sub>2</sub> monolayers, *New J. Chem.* **2020**, *44*, 16135-16143.
7. Nai, J.W.; Yin, H.J.; You, T.T.; Zheng, L.R.; Zhang, J.; Wang, P.X.; Jin, Z.; Tian, Y.; Liu, J.Z.; Tang, Z.Y.; Guo, L. Efficient electrocatalytic water oxidation by using amorphous Ni–Co double hydroxides nanocages, *Adv. Energy Mater.* **2015**, *5*, 1401880.
8. Hu, H.; Guan, B.Y.; Xia, B.Y.; Lou, X.W. Designed formation of Co<sub>3</sub>O<sub>4</sub>/NiCo<sub>2</sub>O<sub>4</sub> double-shelled nanocages with enhanced pseudocapacitive and electrocatalytic properties, *J. Am. Chem. Soc.* **2015**, *137*, 5590-5595.
9. Paliwala, M.K.; Meher, S.K. Study of “Ni-doping” and “open-pore microstructure” as physico-electrochemical stimuli towards the electrocatalytic efficiency of Ni/NiO for the oxygen evolution reaction, *New J. Chem.* **2020**, *44*, 17507-17517.
10. Dileep, N.P.; Vineesh, T.V.; Sarma, P.V.; Chalil, M.V.; Prasad, C.S.; Shaijumon, M.M. Electrochemically Exfoliated  $\beta$ -Co(OH)<sub>2</sub> Nanostructures for enhanced oxygen evolution electrocatalysis, *ACS Appl. Energy Mater.* **2020**, *3*, 1461-1467.
11. Yan, K.L.; Sheng, M.L.; Sun, X.D.; Song, C.; Cao, Z.; Sun, Y.J. Microwave synthesis of ultrathin nickel hydroxide nanosheets with Iron incorporation for electrocatalytic water oxidation, *ACS Appl. Energy Mater.* **2019**, *2*, 1961-1968.
12. Mohanty, B.; Ghorbani-Asl, M.; Kretschmer, S.; Ghosh, A.; Guha, P.; Panda, S.K.; Jena, B.; Krashennnikov, A.V.; Jena, B.K. MoS<sub>2</sub> quantum dots as efficient catalyst materials for the oxygen evolution reaction, *ACS Catal.* **2018**, *8*, 1683-1689.
